1

# 2 ANTsX: A dynamic ecosystem for 3 quantitative biological and medical imaging

4 Nicholas J. Tustison<sup>1,9</sup>, Philip A. Cook<sup>2</sup>, Andrew J. Holbrook<sup>3</sup>, Hans J. Johnson<sup>4</sup>, John  
5 Muschelli<sup>5</sup>, Gabriel A. Devenyi<sup>6</sup>, Jeffrey T. Duda<sup>2</sup>, Sandhitsu R. Das<sup>2</sup>, Nicholas C. Cullen<sup>7</sup>,  
6 Daniel L. Gillen<sup>8</sup>, Michael A. Yassa<sup>9</sup>, James R. Stone<sup>1</sup>, James C. Gee<sup>2</sup>, Brian B. Avants<sup>1</sup> for  
7 the Alzheimer's Disease Neuroimaging Initiative<sup>†</sup>

8 <sup>1</sup>Department of Radiology and Medical Imaging, University of Virginia, Charlottesville, VA

9 <sup>2</sup>Department of Radiology, University of Pennsylvania, Philadelphia, PA

10 <sup>3</sup>Department of Biostatistics, University of California, Los Angeles, CA

11 <sup>4</sup>Department of Electrical and Computer Engineering, University of Iowa, Philadelphia, PA

12 <sup>5</sup>School of Public Health, Johns Hopkins University, Baltimore, MD

13 <sup>6</sup>Douglas Mental Health University Institute, Department of Psychiatry, McGill University, Montreal, QC

14 <sup>7</sup>Lund University, Scania, SE

15 <sup>8</sup>Department of Statistics, University of California, Irvine, CA

16 <sup>9</sup>Department of Neurobiology and Behavior, University of California, Irvine, CA

17 Corresponding author:

18 Nicholas J. Tustison, DSc

19 Department of Radiology and Medical Imaging

20 University of Virginia

21 [ntustison@virginia.edu](mailto:ntustison@virginia.edu)

22

23 <sup>†</sup>Data used in preparation of this article were obtained from the Alzheimer's Disease Neuroimaging Initiative (ADNI) database (<http://adni.loni.usc.edu>). As such, the investigators within the ADNI contributed to the design and implementation of ADNI and/or provided data but did  
24 not participate in analysis or writing of this report. A complete listing of ADNI investigators can be found at: [http://adni.loni.usc.edu/wp-](http://adni.loni.usc.edu/wp-content/uploads/how_to_apply/ADNI_Acknowledgement_List.pdf)  
25 [content/uploads/how](http://adni.loni.usc.edu/wp-content/uploads/how_to_apply/ADNI_Acknowledgement_List.pdf) to apply/ADNI Acknowledgement List.pdf

## 27 Abstract

28 The Advanced Normalizations Tools ecosystem, known as ANTsX, consists of multiple open-  
29 source software libraries which house top-performing algorithms used worldwide by scientific  
30 and research communities for processing and analyzing biological and medical imaging data.  
31 The base software library, ANTs, is built upon, and contributes to, the NIH-sponsored  
32 Insight Toolkit. Founded in 2008 with the highly regarded Symmetric Normalization image  
33 registration framework, the ANTs library has since grown to include additional functionality.  
34 Recent enhancements include statistical, visualization, and deep learning capabilities through  
35 interfacing with both the R statistical project (ANTsR) and Python (ANTsPy). Additionally,  
36 the corresponding deep learning extensions ANTsRNet and ANTsPyNet (built on the popular  
37 TensorFlow/Keras libraries) contain several popular network architectures and trained models  
38 for specific applications. One such comprehensive application is a deep learning analog  
39 for generating cortical thickness data from structural T1-weighted brain MRI. Not only  
40 does this significantly improve computational efficiency and provide comparable-to-superior  
41 accuracy [over multiple criteria relative to](#) the existing ANTs pipelines but it also illustrates  
42 the importance of the comprehensive ANTsX approach as a framework for medical image  
43 analysis.

## 44 **The ANTsX ecosystem: A brief overview**

### 45 **Image registration origins**

46 The Advanced Normalization Tools (ANTs) is a state-of-the-art, open-source software toolkit  
47 for image registration, segmentation, and other functionality for comprehensive biological and  
48 medical image analysis. Historically, ANTs is rooted in advanced image registration techniques  
49 which have been at the forefront of the field due to seminal contributions that date back to  
50 the original elastic matching method of Bajcsy and co-investigators<sup>1-3</sup>. Various independent  
51 platforms have been used to evaluate ANTs tools since their early development. In a landmark  
52 paper<sup>4</sup>, the authors reported an extensive evaluation using multiple neuroimaging datasets  
53 analyzed by fourteen different registration tools, including the Symmetric Normalization  
54 (SyN) algorithm<sup>5</sup>, and found that “ART, SyN, IRTK, and SPM’s DARTEL Toolbox gave  
55 the best results according to overlap and distance measures, with ART and SyN delivering  
56 the most consistently high accuracy across subjects and label sets.” [Participation in other](#)  
57 [independent competitions](#)<sup>6,7</sup> [provided additional evidence of the utility of ANTs registration](#)  
58 [and other tools. Despite the extremely significant potential of deep learning for image](#)  
59 [registration algorithmic development](#)<sup>8</sup>, [ANTs registration tools continue to find application](#)  
60 [in the various biomedical imaging research communities.](#)

### 61 **Current developments**

62 Since its inception, though, ANTs has expanded significantly beyond its image registration  
63 origins. Other core contributions include template building<sup>9</sup>, segmentation<sup>10</sup>, image prepro-  
64 cessing (e.g., bias correction<sup>11</sup> and denoising<sup>12</sup>), joint label fusion<sup>13,14</sup>, and brain cortical  
65 thickness estimation<sup>15,16</sup> (cf Table 1). Additionally, ANTs has been integrated into multiple,  
66 publicly available workflows such as fMRIPrep<sup>17</sup> and the Spinal Cord Toolbox<sup>18</sup>. Frequently  
67 used ANTs pipelines, such as cortical thickness estimation<sup>16</sup>, have been integrated into Docker  
68 containers and packaged as Brain Imaging Data Structure (BIDS)<sup>19</sup> and FlyWheel applica-  
69 tions (i.e., “gears”). It has also been independently ported for various platforms including  
70 Neurodebian<sup>20</sup> (Debian OS), Neuroconductor<sup>21</sup> (the R statistical project), and Nipype<sup>22</sup>

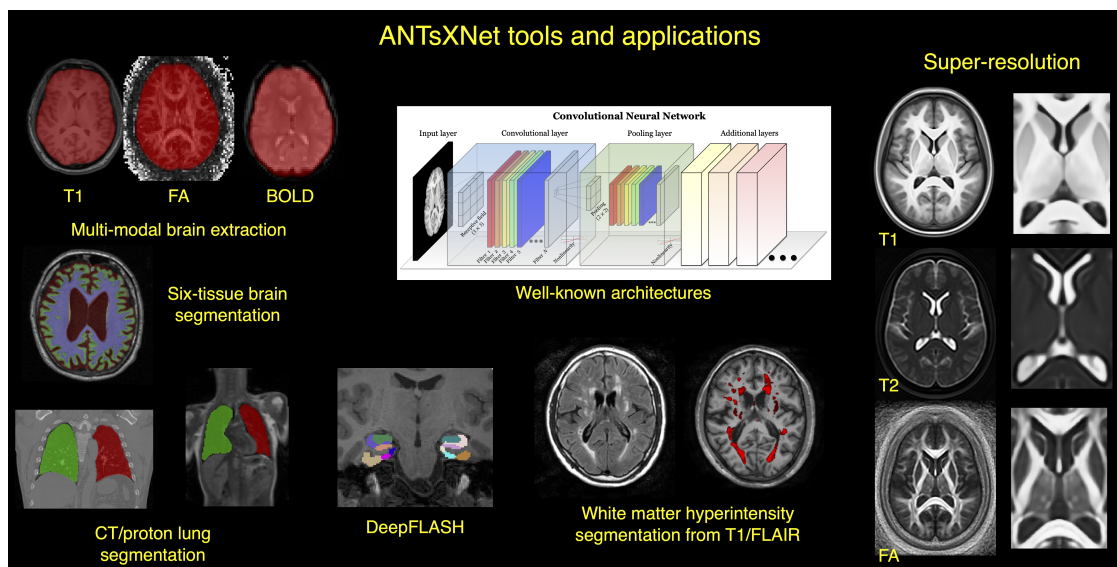

Figure 1: An illustration of the tools and applications available as part of the ANTsRNet and ANTsPyNet deep learning toolkits. Both libraries take advantage of ANTs functionality through their respective language interfaces—ANTsR (R) and ANTsPy (Python). Building on the Keras/TensorFlow language, both libraries standardize popular network architectures within the ANTs ecosystem and are cross-compatible. These networks are used to train models and weights for such applications as brain extraction which are then disseminated to the public.

71 (Python). Even competing softwares, such as FreeSurfer<sup>23</sup>, have incorporated well-performing  
72 and complementary ANTs components<sup>11,12</sup> into their own libraries. Finally, according to  
73 GitHub, recent unique “clones” have averaged 34 per day with the total number of clones  
74 being approximately twice that many. 50 unique contributors to the ANTs library have made  
75 a total of over 4500 commits. Additional insights into usage can be viewed at the ANTs  
76 GitHub website.

77 Over the course of its development, ANTs has been extended to complementary frameworks  
78 resulting in the Python- and R-based ANTsPy and ANTsR toolkits, respectively. These ANTs-  
79 based interfaces with extremely popular, high-level, open-source programming platforms  
80 have significantly increased the user base of ANTs and facilitated research workflows which  
81 leverage the advantages of these high-level programming languages. The rapidly rising  
82 popularity of deep learning motivated further recent enhancement of ANTs and its extensions.  
83 Despite the existence of an abundance of online innovation and code for deep learning  
84 algorithms, much of it is disorganized and lacks a uniformity in structure and external data

| Functionality                                    | Citations |
|--------------------------------------------------|-----------|
| SyN registration <sup>5</sup>                    | 2616      |
| bias field correction <sup>16</sup>              | 2188      |
| ANTs registration evaluation <sup>6</sup>        | 2013      |
| joint label fusion <sup>18</sup>                 | 669       |
| template generation <sup>14</sup>                | 423       |
| cortical thickness: implementation <sup>20</sup> | 321       |
| MAP-MRF segmentation <sup>15</sup>               | 319       |
| ITK integration <sup>12</sup>                    | 250       |
| cortical thickness: theory <sup>19</sup>         | 180       |

Table 1: The significance of core ANTs tools in terms of their number of citations (from October 17, 2020).

85 interfaces which would facilitate greater uptake. With this in mind, ANTsR spawned the deep  
86 learning ANTsRNet package which is a growing Keras/TensorFlow-based library of popular  
87 deep learning architectures and applications specifically geared towards medical imaging.  
88 Analogously, ANTsPyNet is an additional ANTsX complement to ANTsPy. Both, which we  
89 collectively refer to as “ANTsXNet”, are co-developed so as to ensure cross-compatibility  
90 such that training performed in one library is readily accessible by the other library. In  
91 addition to a variety of popular network architectures (which are implemented in both 2-D  
92 and 3-D), ANTsXNet contains a host of functionality for medical image analysis that have  
93 been developed in-house and collected from other open-source projects. For example, an  
94 extremely popular ANTsXNet application is a multi-modal brain extraction tool that uses  
95 different variants of the popular U-net<sup>24</sup> architecture for segmenting the brain in multiple  
96 modalities. These modalities include conventional T1-weighted structural MRI as well as  
97 T2-weighted MRI, FLAIR, fractional anisotropy and BOLD. Demographic specialization also  
98 includes infant T1-weighted and/or T2-weighted MRI. Additionally, we have included other  
99 models and weights into our libraries such as a recent BrainAGE estimation model<sup>25</sup>, based  
100 on > 14,000 individuals; HippMapp3r<sup>26</sup>, a hippocampal segmentation tool; the winning entry  
101 of the MICCAI 2017 white matter hyperintensity segmentation competition<sup>27</sup>; MRI super  
102 resolution using deep-projection networks<sup>28</sup>; and NoBrainer, a T1-weighted brain extraction  
103 approach based on FreeSurfer (see Figure 1).

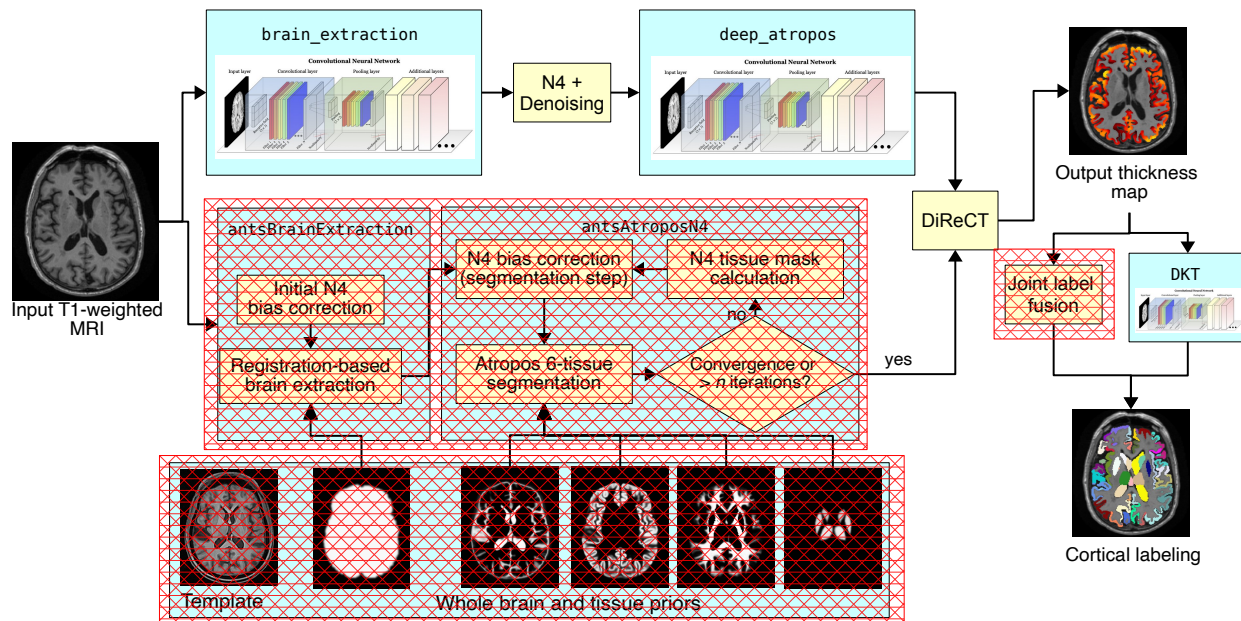

Figure 2: Illustration of the ANTsXNet cortical thickness pipeline and the relationship to its traditional ANTs analog. The hash-designated sections denote pipeline steps which have been obviated by the deep learning approach. These include template-based brain extraction, template-based  $n$ -tissue segmentation, and joint label fusion for cortical labeling.

## 104 The ANTsXNet cortical thickness pipeline

105 The most recent ANTsX innovation involves the development of deep learning analogs of  
 106 our popular ANTs cortical thickness cross-sectional<sup>16</sup> and longitudinal<sup>29</sup> pipelines within  
 107 the ANTsXNet framework for, amongst other potential benefits, increased computational  
 108 efficiency. Figure 2, adapted from our previous work<sup>16</sup>, illustrates some of the major changes  
 109 associated with the single-subject pipeline. It should be noted that this improvement in  
 110 efficiency is principally a result of eliminating deformable image registration from the pipeline—  
 111 a step which has historically been used to propagate prior, population-based information  
 112 (e.g., tissue maps) to individual subjects for such tasks as brain extraction<sup>30</sup> and tissue  
 113 segmentation<sup>10</sup> which is now configured within the neural networks.

114 These structural processing pipelines are currently available as open-source within the  
 115 ANTsXNet libraries which underwent a thorough evaluation using both cross-sectional and  
 116 longitudinal data and discussed within the context of our previous evaluations<sup>16,29</sup>. Note  
 117 that related work has been recently reported by external groups<sup>31,32</sup>. Fortunately, these

118 overlapping contributions provide a context for comparison to motivate the utility of the  
119 ANTsX ecosystem.

## 120 Results

### 121 The original ANTs cortical thickness pipeline

122 The original ANTs cortical thickness pipeline<sup>16</sup> consists of the following steps:

- 123 • preprocessing: denoising<sup>12</sup> and bias correction<sup>33</sup>;
- 124 • brain extraction<sup>30</sup>;
- 125 • brain segmentation with spatial tissue priors<sup>10</sup> comprising the
  - 126 – cerebrospinal fluid (CSF),
  - 127 – gray matter (GM),
  - 128 – white matter (WM),
  - 129 – deep gray matter,
  - 130 – cerebellum, and
  - 131 – brain stem; and
- 132 • cortical thickness estimation<sup>15</sup>.

133 Our recent longitudinal variant incorporates an additional step involving the construction of  
134 a single subject template (SST)<sup>9</sup> coupled with the generation of tissue spatial priors of the  
135 SST for use with the processing of the individual time points as described above.

136 Although the resulting thickness maps are conducive to voxel-based<sup>34</sup> and related analyses<sup>35</sup>,  
137 here we employ the well-known Desikan-Killiany-Tourville (DKT)<sup>36</sup> labeling protocol (31  
138 labels per hemisphere) to parcellate the cortex for averaging thickness values regionally. This  
139 allows us to 1) be consistent in our evaluation strategy for comparison with our previous  
140 work<sup>16,29</sup> and 2) leverage an additional deep learning-based substitution within the proposed  
141 pipeline.

## 142 **Overview of cortical thickness via ANTsXNet**

143 Note that the entire analysis/evaluation framework, from preprocessing to statistical analysis,  
144 is made possible through the ANTsX ecosystem and simplified through the open-source R  
145 and Python platforms. Preprocessing, image registration, and cortical thickness estimation  
146 are all available through the ANTsPy and ANTsR libraries whereas the deep learning steps  
147 are performed through networks constructed and trained via ANTsRNet/ANTsPyNet with  
148 data augmentation strategies and other utilities built from ANTsR/ANTsPy functionality.

149 The brain extraction, brain segmentation, and DKT parcellation deep learning components  
150 were trained using data derived from our previous work<sup>16</sup>. Specifically, the IXI<sup>37</sup>, MMRR<sup>38</sup>,  
151 NKI<sup>39</sup>, and OASIS<sup>40</sup> data sets, and the corresponding derived data, comprising over 1200  
152 subjects from age 4 to 94, were used for network training. Brain extraction employs a  
153 traditional 3-D U-net network<sup>24</sup> with whole brain, template-based data augmentation<sup>41</sup>  
154 whereas brain segmentation and DKT parcellation are processed via 3-D U-net networks  
155 with attention gating<sup>42</sup> on image octant-based batches. We emphasize that a single model  
156 (as opposed to ensemble approaches where multiple models are used to produce the final  
157 solution<sup>27</sup>) was created for each of these steps and was used for all the experiments described  
158 below.

## 159 **Cross-sectional performance evaluation**

160 Due to the absence of ground-truth, we utilize the evaluation strategy from our previous  
161 work<sup>16</sup> where we used cross-validation to build and compare age prediction models from  
162 data derived from both the proposed ANTsXNet pipeline and the established ANTs pipeline.  
163 Specifically, we use “age” as a well-known and widely-available demographic correlate of  
164 cortical thickness<sup>43</sup> and quantify the predictive capabilities of corresponding random forest  
165 classifiers<sup>44</sup> of the form:

$$AGE \sim VOLUME + GENDER + \sum_{i=1}^{62} T(DKT_i) \quad (1)$$



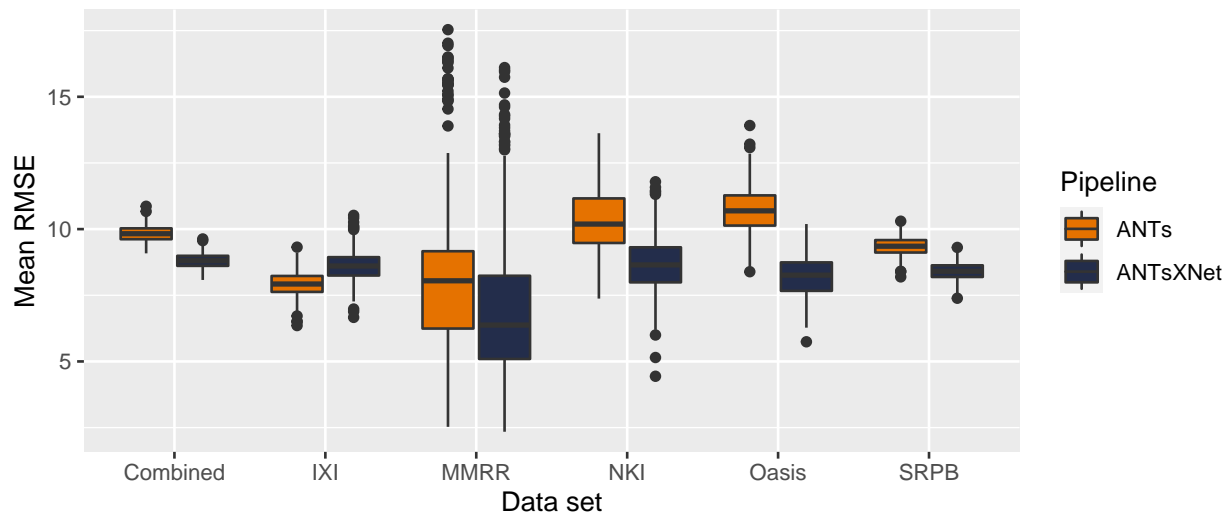

Figure 3: Distribution of mean RMSE values (500 permutations) for age prediction across the different data sets between the traditional ANTs and deep learning-based ANTsXNet pipelines. Total mean values are as follows: Combined—9.3 years (ANTs) and 8.2 years (ANTsXNet); IXI—7.9 years (ANTs) and 8.6 years (ANTsXNet); MMRR—7.9 years (ANTs) and 7.6 years (ANTsXNet); NKI—8.7 years (ANTs) and 7.9 years (ANTsXNet); OASIS—9.2 years (ANTs) and 8.0 years (ANTsXNet); and SRPB—9.2 years (ANTs) and 8.1 years (ANTsXNet).

166 with covariates *GENDER* and *VOLUME* (i.e., total intracranial volume).  $T(DKT_i)$  is the  
167 average thickness value in the  $i^{th}$  DKT region. Root mean square error (RMSE) between  
168 the actual and predicted ages are the quantity used for comparative evaluation. As we have  
169 explained previously<sup>16</sup>, we find these evaluation measures to be much more useful than other  
170 commonly applied criteria as they are closer to assessing the actual utility of these thickness  
171 measurements as biomarkers for disease<sup>45</sup> or growth. For example, in recent work<sup>31</sup> the  
172 authors employ correlation with FreeSurfer thickness values as the primary evaluation for  
173 assessing relative performance with ANTs cortical thickness<sup>16</sup>. This evaluation, unfortunately,  
174 is fundamentally flawed in that it is a prime example of a type of circularity analysis<sup>46</sup> whereby  
175 data selection is driven by the same criteria used to evaluate performance. Specifically, the  
176 underlying DeepSCAN network used for the tissue segmentation step employs training based  
177 on FreeSurfer results which directly influences thickness values as thickness/segmentation  
178 are highly correlated and vary characteristically between software packages. Relative perfor-  
179 mance with ANTs thickness (which does not use FreeSurfer for training) is then assessed by  
180 determining correlations with FreeSurfer thickness values. Almost as problematic is their

181 use of repeatability, which they confusingly label as “robustness,” as an additional ranking  
182 criterion. Repeatability evaluations should be contextualized within considerations such  
183 as the bias-variance tradeoff and quantified using relevant metrics, such as the intra-class  
184 correlation coefficient which takes into account both inter- and intra-observer variability.

185 In addition to the training data listed above, to ensure generalizability, we also compared  
186 performance using the SRPB data set<sup>47</sup> comprising over 1600 participants from 12 sites. Note  
187 that we recognize that we are processing a portion of the evaluation data through certain  
188 components of the proposed deep learning-based pipeline that were used to train the same  
189 pipeline components. Although this does not provide evidence for generalizability (which is  
190 why we include the much larger SRPB data set), it is still interesting to examine the results  
191 since, in this case, the deep learning training can be considered a type of noise reduction on  
192 the final results. It should be noted that training did not use age prediction (or any other  
193 evaluation or related measure) as a criterion to be optimized during network model training  
194 (i.e., circular analysis<sup>46</sup>).

195 The results are shown in Figure 3 where we used cross-validation with 500 permutations  
196 per model per data set (including a “combined” set) and an 80/20 training/testing split.  
197 The ANTsXNet deep learning pipeline outperformed the classical pipeline<sup>16</sup> in terms of age  
198 prediction in all data sets except for IXI. This also includes the cross-validation iteration  
199 where all data sets were combined. Importance plots ranking the cortical thickness regions  
200 and the other covariates of Equation (1) are shown in Figure 4. Rankings employ “MeanDe-  
201 creaseAccuracy” which quantifies the decrease in model accuracy based on the exclusion of a  
202 specific random forest regressor. Additionally, repeatability assessment on the MMRR data  
203 set yielded ICC values (“average random rater”) of 0.99 for both pipelines.

## 204 **Longitudinal performance evaluation**

205 Given the excellent performance and superior computational efficiency of the proposed  
206 ANTsXNet pipeline for cross-sectional data, we evaluated its performance on longitudinal  
207 data using the longitudinally-specific evaluation strategy and data we employed with the  
208 introduction of the longitudinal version of the ANTs cortical thickness pipeline<sup>29</sup>. We also

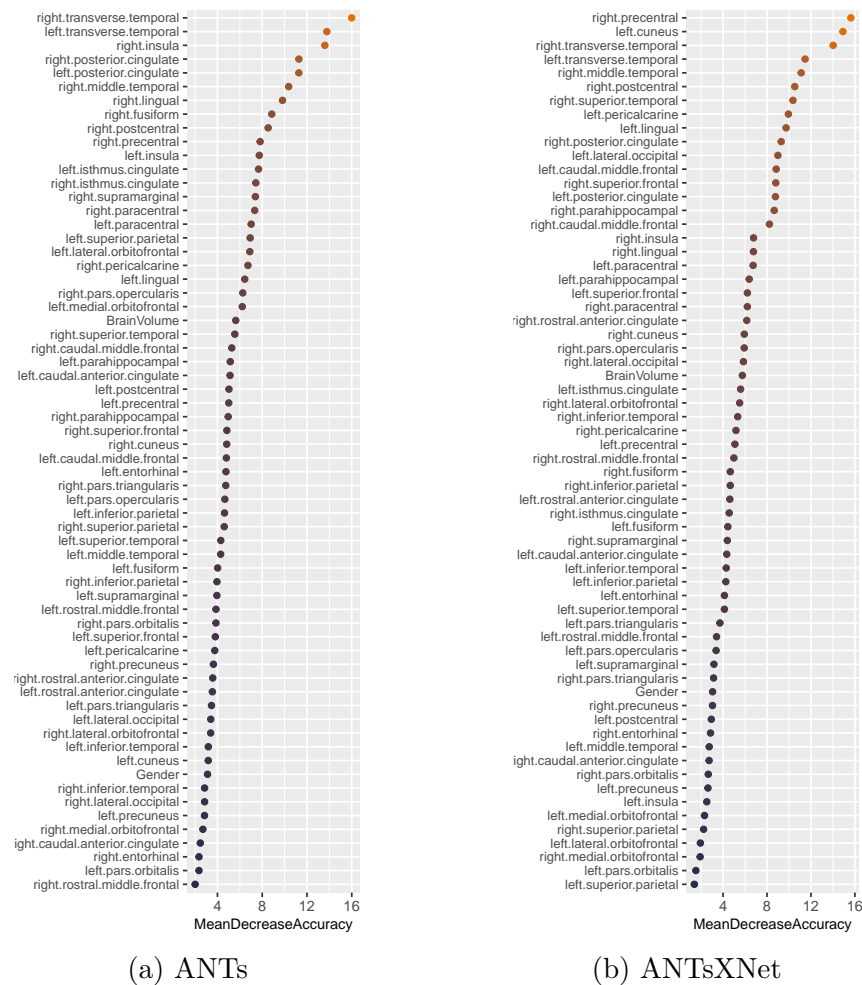

Figure 4: Importance plots for the SRPB data set using “MeanDecreaseAccuracy” for the random forest regressors (i.e., cortical thickness regions, gender, and brain volume specified by Equation (1)).

209 evaluated an ANTsXNet-based pipeline tailored specifically for longitudinal data. In this  
 210 variant, an SST is generated and processed using the previously described ANTsXNet cross-  
 211 sectional pipeline which yields tissue spatial priors. These spatial priors are used in our  
 212 traditional brain segmentation approach<sup>10</sup>. The computational efficiency of this variant is  
 213 also significantly improved due to the elimination of the costly SST prior generation which  
 214 uses multiple registrations combined with joint label fusion<sup>14</sup>.

215 The ADNI-1 data used for our previous longitudinal performance evaluation<sup>29</sup> consisted of  
 216 over 600 subjects (197 cognitive normals, 324 LMCI subjects, and 142 AD subjects) with  
 217 one or more follow-up image acquisition sessions every 6 months (up to 36 months) for a

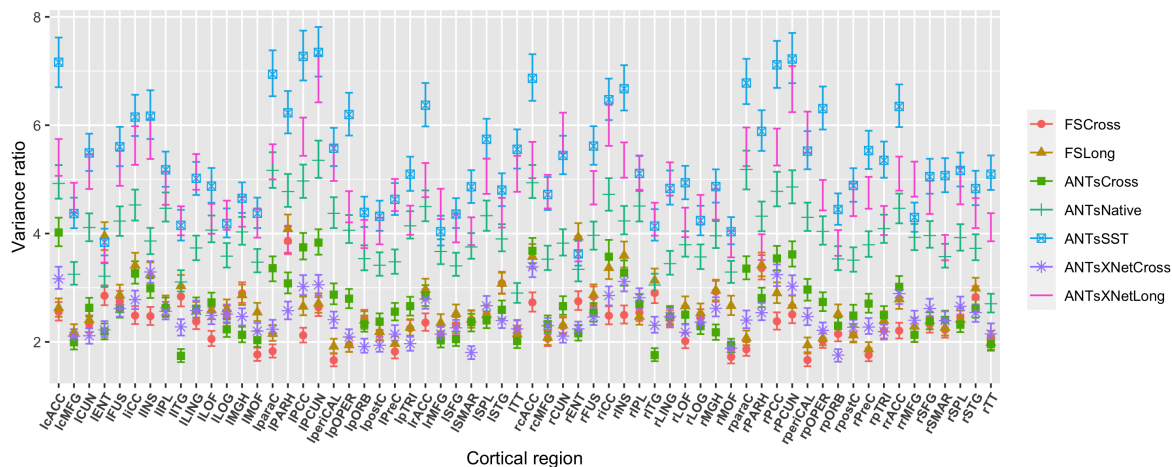

(a)

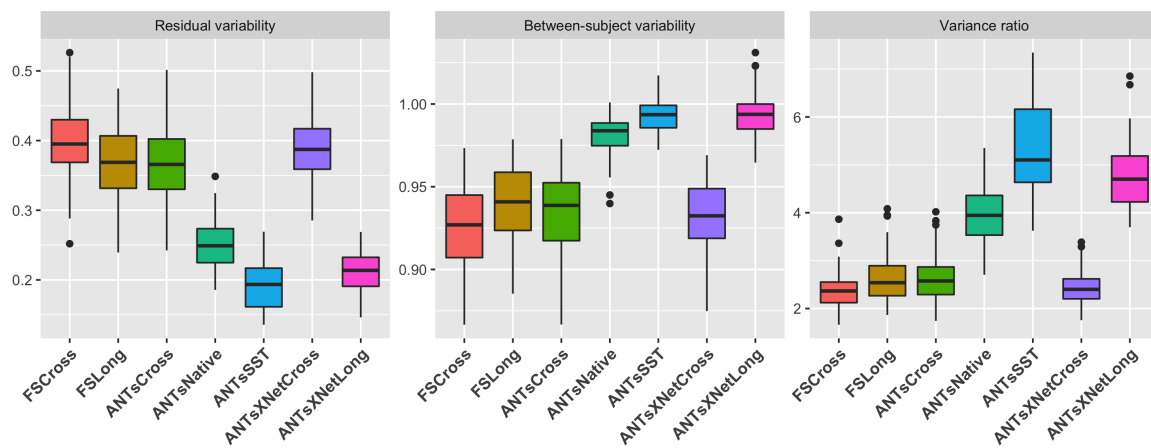

(b)

Figure 5: Performance over longitudinal data as determined by the variance ratio. (a) Region-specific 95% confidence intervals of the variance ratio showing the superior performance of the longitudinally tailored ANTsX-based pipelines, including ANTsSST and ANTsXNetLong. (b) Residual variability, between-subject, and variance ratio values per pipeline over all DKT regions.

218 total of over 2500 images. In addition to the ANTsXNet pipelines (“ANTsXNetCross” and  
 219 “ANTsXNetLong”) for the current evaluation, our previous work included the FreeSurfer<sup>23</sup>  
 220 cross-sectional (“FSCross”) and longitudinal (“FSLong”) streams, the ANTs cross-sectional  
 221 pipeline (“ANTsCross”) in addition to two longitudinal ANTs-based variants (“ANTsNative”  
 222 and “ANTsSST”). Two evaluation measurements, one unsupervised and one supervised, were  
 223 used to assess comparative performance between all five pipelines. We add the results of the  
 224 ANTsXNet pipeline [cross-sectional and longitudinal](#) evaluations in relation to these other

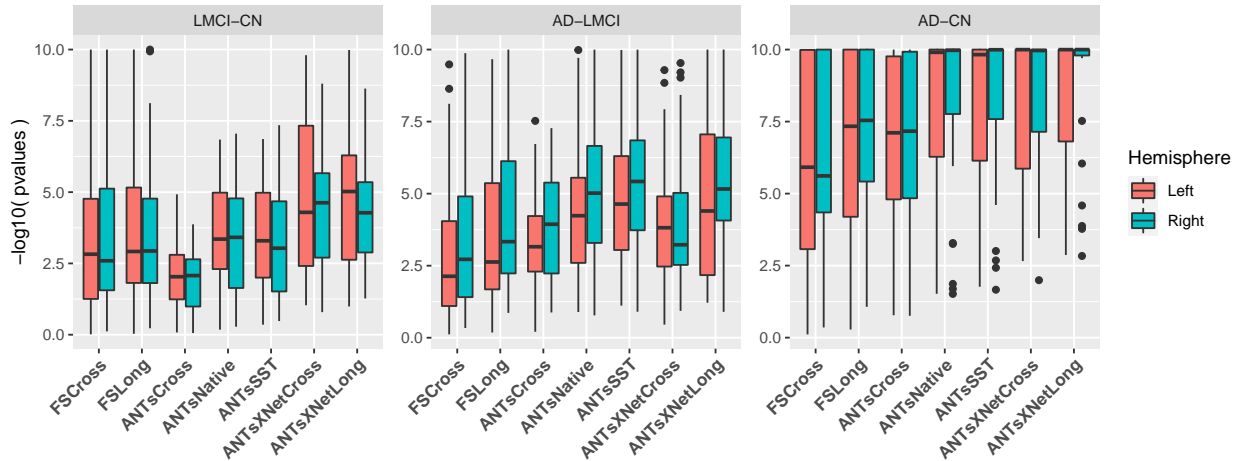

Figure 6: Measures for the both the supervised and unsupervised evaluation strategies, respectively given in (a) and (b). (a) Log p-values for diagnostic differentiation of LMCI-CN, AD-LMCI, and AD-CN subjects for all pipelines over all DKT regions. (b) Residual variability, between subject, and variance ratio values per pipeline over all DKT regions.

225 pipelines to provide a comprehensive overview of relative performance.

First, the supervised evaluation employed Tukey post-hoc analyses with false discovery rate (FDR) adjustment to test the significance of the LMCI-CN, AD-LMCI, and AD-CN diagnostic contrasts. This is provided by the following [linear mixed-effects](#) LME model

$$\Delta Y \sim Y_{bl} + AGE_{bl} + ICV_{bl} + APOE_{bl} + GENDER + DIAGNOSIS_{bl} \quad (2)$$

$$+ VISIT : DIAGNOSIS_{bl} + (1|ID) + (1|SITE).$$

226 Here,  $\Delta Y$  is the change in thickness of the  $k^{th}$  DKT region from baseline (bl) thickness  
 227  $Y_{bl}$  with random intercepts for both the individual subject ( $ID$ ) and the acquisition site.  
 228 The subject-specific covariates  $AGE$ ,  $APOE$  status,  $GENDER$ ,  $DIAGNOSIS$ ,  $ICV$ , and  
 229  $VISIT$  were taken directly from the ADNIMERGE package.

Second, LME<sup>48</sup> modeling was used to quantify between-subject and residual variabilities, the ratio of which provides an estimate of the effectiveness of a given biomarker for distinguishing between subpopulations. In order to assess this criteria while accounting for changes that

may occur through the passage of time, we used the following Bayesian LME model:

$$\begin{aligned} Y_{ij}^k &\sim N(\alpha_i^k + \beta_i^k t_{ij}, \sigma_k^2) \\ \alpha_i^k &\sim N(\alpha_0^k, \tau_k^2) \quad \beta_i^k \sim N(\beta_0^k, \rho_k^2) \\ \alpha_0^k, \beta_0^k &\sim N(0, 10) \quad \sigma_k, \tau_k, \rho_k \sim \text{Cauchy}^+(0, 5) \end{aligned} \quad (3)$$

where  $Y_{ij}^k$  denotes the  $i^{\text{th}}$  individual's cortical thickness measurement corresponding to the  $k^{\text{th}}$  region of interest at the time point indexed by  $j$  and specification of variance priors to half-Cauchy distributions reflects commonly accepted best practice in the context of hierarchical models<sup>49</sup>. The ratio of interest,  $r^k$ , per region of the between-subject variability,  $\tau_k$ , and residual variability,  $\sigma_k$  is

$$r^k = \frac{\tau_k}{\sigma_k}, k = 1, \dots, 62 \quad (4)$$

230 where the posterior distribution of  $r_k$  was summarized via the posterior median.

231 Results for both longitudinal evaluation scenarios are shown in Figure 6. Log p-values are  
232 provided in Figure 6(a) which demonstrate excellent LMCI-CN and AD-CN differentiation  
233 and comparable AD-LMCI differentiation relative to the other pipelines. Figure 6(b) shows  
234 significantly better performance for the longitudinal ANTsXNet pipeline where, in a longi-  
235 tudinal setting, we prefer to see lower values for residual variability and higher values for  
236 between-subject variability, leading to a larger variance ratio. In contrast, cross-sectional  
237 ANTsXNet performs remarkably poorly for these measures.

## 238 Discussion

239 The ANTsX software ecosystem provides a comprehensive framework for quantitative biologi-  
240 cal and medical imaging. Although ANTs, the original core of ANTsX, is still at the forefront  
241 of image registration technology, it has moved significantly beyond its image registration  
242 origins. This expansion is not confined to technical contributions (of which there are many)  
243 but also consists of facilitating access to a wide range of users who can use ANTsX tools

244 (whether through bash, Python, or R scripting) to construct tailored pipelines for their own  
245 studies or to take advantage of our pre-fabricated pipelines. And given the open-source  
246 nature of the ANTsX software, usage is not limited, for example, to academic institutions—a  
247 common constraint characteristic of other packages.

248 One of our most widely used pipelines is the estimation of cortical thickness from neuroimag-  
249 ing. This is understandable given the widespread usage of regional cortical thickness as a  
250 biomarker for developmental or pathological trajectories of the brain. In this work, we used  
251 this well-vetted ANTs tool to provide training data for producing alternative variants which  
252 leverage deep learning for improved computational efficiency and also provides superior perfor-  
253 mance with respect to previously proposed evaluation measures for both cross-sectional<sup>16</sup> and  
254 longitudinal scenarios<sup>29</sup>. In addition to providing the tools which generated the original train-  
255 ing data for the proposed ANTsXNet pipeline, the ANTsX ecosystem provides a full-featured  
256 platform for the additional steps such as preprocessing (ANTsR/ANTsPy); data augmenta-  
257 tion (ANTsR/ANTsPy); network construction and training (ANTsRNet/ANTsPyNet); and  
258 visualization and statistical analysis of the results (ANTsR/ANTsPy).

259 It is the comprehensiveness of ANTsX that provides significant advantages over much of the  
260 deep learning work that is currently taking place in medical imaging. In other words, various  
261 steps in the deep learning training processing (e.g., data augmentation, preprocessing) can all  
262 be performed within the same ecosystem where such important details as header information  
263 for image geometry are treated the same. In contrast, related work<sup>31</sup> described and evaluated  
264 a similar thickness measurement pipeline. However, due to the lack of a complete processing  
265 and analysis framework, training data was generated using the FreeSurfer stream, deep  
266 learning-based brain segmentation employed DeepSCAN<sup>50</sup> (in-house software), and cortical  
267 thickness estimation<sup>15</sup> was generated using the ANTs toolkit. For the reader interested in  
268 reproducing the authors' results, they are primarily prevented from doing so due, as far as  
269 we can tell, to the lack of the public availability of the DeepSCAN software. However, in  
270 addition, the interested reader must also ensure the consistency of the input/output interface  
271 between packages (a task for which the Nipype development team is quite familiar.)

272 In terms of future work, the recent surge and utility of deep learning in medical image analysis  
273 has significantly guided the areas of active ANTsX development. As demonstrated in this  
274 work with our widely used cortical thickness pipelines, there are many potential benefits  
275 of deep learning analogs to existing ANTs tools as well as the development of new ones.  
276 Performance is **mostly** comparable-to-superior relative to existing pipelines depending on  
277 the evaluation metric. **Specifically, the ANTsXNet cross-sectional pipeline does well for the**  
278 **age prediction performance framework and in terms of the ICC. Additionally, this pipeline**  
279 **performs relatively well for longitudinal ADNI data for disease differentiation but not so**  
280 **much in terms of the generic variance ratio criterion. However, for such longitudinal-specific**  
281 **studies, the ANTsXNet longitudinal variant performs well for both performance measures.**  
282 We see possible additional longitudinal extensions incorporating subject ID and months as  
283 additional network inputs.

## 284 Methods

285 Software, average DKT regional thickness values for all data sets, and the scripts to perform  
286 both the analysis and obtain thickness values for a single subject (**cross-sectionally or**  
287 **longitudinally**) are provided as open-source. Specifically, all the ANTsX libraries are hosted  
288 on GitHub (<https://github.com/ANTsX>). The cross-sectional data and analysis code are  
289 available as .csv files and R scripts at the GitHub repository dedicated to this paper (<https://github.com/ntustison/PaperANTsX>) whereas the longitudinal data and evaluation scripts  
290 are organized with the repository associated with our previous work<sup>29</sup> (<https://github.com/ntustison/CrossLong>).

## 293 Implementation

```
294  
295 import ants  
296 import antspynet  
297  
298 # ANTsPy/ANTsPyNet processing for subject IXI002-Guys-0828-T1  
299 t1_file = "IXI002-Guys-0828-T1.nii.gz"  
300 t1 = ants.image_read(t1_file)  
301  
302 # Atropos six-tissue segmentation  
303 atropos = antspynet.deep_atropos(t1, do_preprocessing=True, verbose=True)
```



```
304
305 # Kelly Kapowski cortical thickness (combine Atropos WM and deep GM)
306 kk_segmentation = atropos['segmentation_image']
307 kk_segmentation[kk_segmentation == 4] = 3
308 kk_gray_matter = atropos['probability_images'][2]
309 kk_white_matter = atropos['probability_images'][3] + atropos['probability_images'][4]
310 kk = ants.kelly_kapowski(s=kk_segmentation, g=kk_gray_matter, w=kk_white_matter,
311                        its=45, r=0.025, m=1.5, x=0, verbose=1)
312
313 # Desikan-Killiany-Tourville labeling
314 dkt = antspynet.desikan_killiany_tourville_labeling(t1, do_preprocessing=True, verbose=True)
315
316 # DKT label propagation throughout the cortex
317 dkt_cortical_mask = ants.threshold_image(dkt, 1000, 3000, 1, 0)
318 dkt = dkt_cortical_mask * dkt
319 kk_mask = ants.threshold_image(kk, 0, 0, 0, 1)
320 dkt_propagated = ants.iMath(kk_mask, "PropagateLabelsThroughMask", kk_mask * dkt)
321
322 # Get average regional thickness values
323 kk_regional_stats = ants.label_stats(kk, dkt_propagated)
324
```

Listing 1: ANTsPy/ANTsPyNet command calls for a single IXI subject in the evaluation study for the cross-sectional pipeline.

325 In Listing 1, we show the ANTsPy/ANTsPyNet code snippet for cross-sectional processing  
326 a single subject which starts with reading the T1-weighted MRI input image, through the  
327 generation of the Atropos-style six-tissue segmentation and probability images, applica-  
328 tion of `ants.kelly_kapowski` (i.e., DiReCT), DKT cortical parcellation, subsequent label  
329 propagation through the cortex, and, finally, regional cortical thickness tabulation. [The](#)  
330 [cross-sectional and longitudinal pipelines are encapsulated in the ANTsPyNet functions](#)  
331 `antspynet.cortical_thickness` and `antspynet.longitudinal_cortical_thickness`, re-  
332 [spectively](#). Note that there are precise, line-by-line R-based analogs available through  
333 ANTsR/ANTsRNet.

334 Both the `ants.deep_atropos` and `antspynet.desikan_killiany_tourville_labeling`  
335 functions perform brain extraction using the `antspynet.brain_extraction` function. Inter-  
336 nally, `antspynet.brain_extraction` contains the requisite code to build the network and  
337 assign the appropriate hyperparameters. The model weights are automatically downloaded  
338 from the online hosting site <https://figshare.com> (see the function `get_pretrained_network`  
339 in ANTsPyNet or `getPretrainedNetwork` in ANTsRNet for links to all models and weights)  
340 and loaded to the constructed network. `antspynet.brain_extraction` performs a quick  
341 translation transformation to a specific template (also downloaded automatically) using the  
342 centers of intensity mass, a common alignment initialization strategy. This is to ensure

343 proper gross orientation. Following brain extraction, preprocessing for the other two deep  
344 learning components includes `ants.denoise_image` and `ants.n4_bias_correction` and an  
345 affine-based reorientation to a version of the MNI template<sup>51</sup>.

346 We recognize the presence of some redundancy due to the repeated application of certain  
347 preprocessing steps. Thus, each function has a `do_preprocessing` option to eliminate this  
348 redundancy for knowledgeable users but, for simplicity in presentation purposes, we do not  
349 provide this modified pipeline here. Although it should be noted that the time difference is  
350 minimal considering the longer time required by `ants.kelly_kapowski`. `ants.deep_atropos`  
351 returns the segmentation image as well as the posterior probability maps for each tissue  
352 type listed previously. `antspynet.desikan_killiany_tourville_labeling` returns only  
353 the segmentation label image which includes not only the 62 cortical labels but the remaining  
354 labels as well. The label numbers and corresponding structure names are given in the program  
355 description/help. Because the DKT parcellation will, in general, not exactly coincide with  
356 the non-zero voxels of the resulting cortical thickness maps, we perform a label propagation  
357 step to ensure the entire cortex, and only the non-zero thickness values in the cortex, are  
358 included in the tabulated regional values.

359 As mentioned previously, the longitudinal version, `antspynet.longitudinal_cortical_thickness`,  
360 adds an SST generation step which can either be provided as a program input or it can  
361 be constructed from spatial normalization of all time points to a specified template.  
362 `ants.deep_atropos` is applied to the SST yielding spatial tissues priors which are then used  
363 as input to `ants.atropos` for each time point. `ants.kelly_kapowski` is applied to the  
364 result to generate the desired cortical thickness maps.

365 Computational time on a CPU-only platform is approximately 1 hour primarily due to  
366 `ants.kelly_kapowski` processing. Other preprocessing steps, i.e., bias correction and de-  
367 noising, are on the order of a couple minutes. This total time should be compared with 4 – 5  
368 hours using the traditional pipeline employing the `quick` registration option or 10 – 15 hours  
369 with the more comprehensive registration parameters employed). As mentioned previously,  
370 elimination of the registration-based propagation of prior probability images to individual

371 subjects is the principal source of reduced computational time. For ROI-based analyses, this  
372 is in addition to the elimination of the optional generation of a population-specific template.  
373 Additionally, the use of `antspynet.desikan_killiany_tourville_labeling`, for cortical  
374 labeling (which completes in less than five minutes) eliminates the need for joint label fusion  
375 which requires multiple pairwise registrations for each subject in addition to the fusion  
376 algorithm itself.

## 377 **Training details**

378 Training differed slightly between models and so we provide details for each of these com-  
379 ponents below. For all training, we used ANTsRNet scripts and custom batch generators.  
380 Although the network construction and other functionality is available in both ANTsPyNet  
381 and ANTsRNet (as is model weights compatibility), we have not written such custom batch  
382 generators for the former (although this is on our to-do list). In terms of hardware, all  
383 training was done on a DGX (GPUs: 4X Tesla V100, system memory: 256 GB LRDIMM  
384 DDR4).

385 **T1-weighted brain extraction.** A whole-image 3-D U-net model<sup>24</sup> was used in conjunction  
386 with multiple training sessions employing a Dice loss function followed by categorical cross  
387 entropy. Training data was derived from the same multi-site data described previously  
388 processed through our registration-based approach<sup>30</sup>. A center-of-mass-based transformation  
389 to a standard template was used to standardize such parameters as orientation and voxel size.  
390 However, to account for possible different header orientations of input data, a template-based  
391 data augmentation scheme was used<sup>41</sup> whereby forward and inverse transforms are used  
392 to randomly warp batch images between members of the training population (followed by  
393 reorientation to the standard template). A digital random coin flipping for possible histogram  
394 matching<sup>52</sup> between source and target images further increased data augmentation. The  
395 output of the network is a probabilistic mask of the brain. Although not detailed here,  
396 training for brain extraction in other modalities was performed similarly.

397 **Deep Atropos.** Dealing with 3-D data presents unique barriers for training that are often  
398 unique to medical imaging. Various strategies are employed such as minimizing the number

399 of layers and/or the number of filters at the base layer of the U-net architecture (as we do  
400 for brain extraction). However, we found this to be too limiting for capturing certain brain  
401 structures such as the cortex. 2-D and 2.5-D approaches are often used with varying levels of  
402 success but we also found better performance using full 3-D information. This led us to try  
403 randomly selected 3-D patches of various sizes. However, for both the six-tissue segmentations  
404 and DKT parcellations, we found that an octant-based patch strategy yielded the desired  
405 results. Specifically, after a brain extracted affine normalization to the MNI template, the  
406 normalized image is cropped to a size of [160, 190, 160]. Overlapping octant patches of size  
407 [112, 112, 112] were extracted from each image and trained using a batch size of 12 such  
408 octant patches with weighted categorical cross entropy as the loss function. As we point out  
409 in our earlier work<sup>16</sup>, obtaining proper brain segmentation is perhaps the most critical step  
410 to estimating thickness values that have the greatest utility as a potential biomarker. In fact,  
411 the first and last authors (NT and BA, respectively) spent much time during the original  
412 ANTs pipeline development<sup>16</sup> trying to get the segmentation correct which required manually  
413 looking at many images and manually adjusting where necessary. This fine-tuning is often  
414 omitted or not considered when other groups<sup>31,53,54</sup> use components of our cortical thickness  
415 pipeline which can be potentially problematic<sup>55</sup>. Fine-tuning for this particular workflow was  
416 also performed between the first and last authors using manual variation of the weights in the  
417 weighted categorical cross entropy. [Specifically, the weights of each tissue type was altered in  
418 order to produce segmentations which most resemble the traditional Atropos segmentations.](#)  
419 Ultimately, we settled on a weight vector of (0.05, 1.5, 1, 3, 4, 3, 3) for the CSF, GM, WM,  
420 Deep GM, brain stem, and cerebellum, respectively. Other hyperparameters can be directly  
421 inferred from explicit specification in the actual code. As mentioned previously, training  
422 data was derived from application of the ANTs Atropos segmentation<sup>10</sup> during the course of  
423 our previous work<sup>16</sup>. Data augmentation included small affine and deformable perturbations  
424 using `antspynet.randomly_transform_image_data` and random contralateral flips.

425 **Desikan-Killiany-Tourville parcellation.** Preprocessing for the DKT parcellation train-  
426 ing was similar to the Deep Atropos training. However, the number of labels and the  
427 complexity of the parcellation required deviation from other training steps. First, labeling

428 was split into an inner set and an outer set. Subsequent training was performed separately  
429 for both of these sets. For the cortical labels, a set of corresponding input prior probability  
430 maps were constructed from the training data (and are also available and automatically  
431 downloaded, when needed, from <https://figshare.com>). Training occurred over multiple  
432 sessions where, initially, categorical cross entropy was used and then subsequently refined  
433 using a Dice loss function. Whole-brain training was performed on a brain-cropped template  
434 size of [96, 112, 96]. Inner label training was performed similarly to our brain extraction  
435 training where the number of layers at the base layer was reduced to eight. Training also  
436 occurred over multiple sessions where, initially, categorical cross entropy was used and then  
437 subsequently refined using a Dice loss function. Other hyperparameters can be directly  
438 inferred from explicit specification in the actual code. Training data was derived from  
439 application of joint label fusion<sup>13</sup> during the course of our previous work<sup>16</sup>. When call-  
440 ing `antspynet.desikan_killiany_tourville_labeling`, inner labels are estimated first  
441 followed by the outer, cortical labels.

## 442 Acknowledgments

443 Data collection and sharing for this project was funded by the Alzheimer’s Disease Neu-  
444 roimaging Initiative (ADNI) (National Institutes of Health Grant U01 AG024904) and DOD  
445 ADNI (Department of Defense award number W81XWH-12-2-0012). ADNI is funded by the  
446 National Institute on Aging, the National Institute of Biomedical Imaging and Bioengineering,  
447 and through generous contributions from the following: AbbVie, Alzheimer’s Association;  
448 Alzheimer’s Drug Discovery Foundation; Araclon Biotech; BioClinica, Inc.; Biogen; Bristol-  
449 Myers Squibb Company; CereSpir, Inc.; Cogstate; Eisai Inc.; Elan Pharmaceuticals, Inc.;  
450 Eli Lilly and Company; EuroImmun; F. Hoffmann-La Roche Ltd and its affiliated company  
451 Genentech, Inc.; Fujirebio; GE Healthcare; IXICO Ltd.; Janssen Alzheimer Immunotherapy  
452 Research & Development, LLC.; Johnson & Johnson Pharmaceutical Research & Development  
453 LLC.; Lumosity; Lundbeck; Merck & Co., Inc.; Meso Scale Diagnostics, LLC.; NeuroRx  
454 Research; Neurotrack Technologies; Novartis Pharmaceuticals Corporation; Pfizer Inc.; Pira-  
455 mal Imaging; Servier; Takeda Pharmaceutical Company; and Transition Therapeutics. The  
456 Canadian Institutes of Health Research is providing funds to support ADNI clinical sites  
457 in Canada. Private sector contributions are facilitated by the Foundation for the National  
458 Institutes of Health ([www.fnih.org](http://www.fnih.org)). The grantee organization is the Northern California  
459 Institute for Research and Education, and the study is coordinated by the Alzheimer’s  
460 Therapeutic Research Institute at the University of Southern California. ADNI data are  
461 disseminated by the Laboratory for Neuro Imaging at the University of Southern California.

## 462 References

- 463 1. Bajcsy, R. & Broit, C. Matching of deformed images. in *Sixth International Conference on*  
464 *Pattern Recognition (ICPR'82)* 351–353 (1982).
- 465 2. Bajcsy, R. & Kovacic, S. Multiresolution elastic matching. *Computer Vision, Graphics,*  
466 *and Image Processing* **46**, 1–21 (1989).
- 467 3. Gee, J., Sundaram, T., Hasegawa, I., Uematsu, H. & Hatabu, H. Characterization of  
468 regional pulmonary mechanics from serial magnetic resonance imaging data. *Acad Radiol* **10**,  
469 1147–52 (2003).
- 470 4. Klein, A. *et al.* Evaluation of 14 nonlinear deformation algorithms applied to human brain  
471 MRI registration. *Neuroimage* **46**, 786–802 (2009).
- 472 5. Avants, B. B., Epstein, C. L., Grossman, M. & Gee, J. C. Symmetric diffeomorphic  
473 image registration with cross-correlation: Evaluating automated labeling of elderly and  
474 neurodegenerative brain. *Med Image Anal* **12**, 26–41 (2008).
- 475 6. Murphy, K. *et al.* Evaluation of registration methods on thoracic CT: The EMPIRE10  
476 challenge. *IEEE Trans Med Imaging* **30**, 1901–20 (2011).
- 477 7. Menze, B., Reyes, M. & Van Leemput, K. The multimodal brain tumor image segmentation  
478 benchmark (BRATS). *IEEE Trans Med Imaging* (2014) doi:[10.1109/TMI.2014.2377694](https://doi.org/10.1109/TMI.2014.2377694).
- 479 8. Tustison, N. J., Avants, B. B. & Gee, J. C. Learning image-based spatial transformations  
480 via convolutional neural networks: A review. *Magn Reson Imaging* **64**, 142–153 (2019).
- 481 9. Avants, B. B. *et al.* The optimal template effect in hippocampus studies of diseased  
482 populations. *Neuroimage* **49**, 2457–66 (2010).
- 483 10. Avants, B. B., Tustison, N. J., Wu, J., Cook, P. A. & Gee, J. C. An open source multivariate  
484 framework for *n*-tissue segmentation with evaluation on public data. *Neuroinformatics* **9**,  
485 381–400 (2011).

- 486 11. Tustison, N. J. & Gee, J. C. N4ITK: Nick's N3 ITK implementation for MRI bias field  
487 correction. *The Insight Journal* (2009).
- 488 12. Manjón, J. V., Coupé, P., Martí-Bonmatí, L., Collins, D. L. & Robles, M. Adaptive  
489 non-local means denoising of MR images with spatially varying noise levels. *J Magn Reson*  
490 *Imaging* **31**, 192–203 (2010).
- 491 13. Wang, H. & Yushkevich, P. A. Multi-atlas segmentation with joint label fusion and  
492 corrective learning—an open source implementation. *Front Neuroinform* **7**, 27 (2013).
- 493 14. Wang, H. *et al.* Multi-atlas segmentation with joint label fusion. *IEEE Trans Pattern*  
494 *Anal Mach Intell* **35**, 611–23 (2013).
- 495 15. Das, S. R., Avants, B. B., Grossman, M. & Gee, J. C. Registration based cortical thickness  
496 measurement. *Neuroimage* **45**, 867–79 (2009).
- 497 16. Tustison, N. J. *et al.* Large-scale evaluation of ANTs and FreeSurfer cortical thickness  
498 measurements. *Neuroimage* **99**, 166–79 (2014).
- 499 17. Esteban, O. *et al.* FMRIPrep: A robust preprocessing pipeline for functional MRI. *Nat*  
500 *Methods* **16**, 111–116 (2019).
- 501 18. De Leener, B. *et al.* SCT: Spinal cord toolbox, an open-source software for processing  
502 spinal cord MRI data. *Neuroimage* **145**, 24–43 (2017).
- 503 19. Gorgolewski, K. J. *et al.* The brain imaging data structure, a format for organizing and  
504 describing outputs of neuroimaging experiments. *Sci Data* **3**, 160044 (2016).
- 505 20. Halchenko, Y. O. & Hanke, M. Open is not enough. Let's take the next step: An  
506 integrated, community-driven computing platform for neuroscience. *Front Neuroinform* **6**, 22  
507 (2012).
- 508 21. Muschelli, J. *et al.* Neuroconductor: An R platform for medical imaging analysis.  
509 *Biostatistics* **20**, 218–239 (2019).



- 510 22. Gorgolewski, K. *et al.* Nipype: A flexible, lightweight and extensible neuroimaging data  
511 processing framework in python. *Front Neuroinform* **5**, 13 (2011).
- 512 23. Fischl, B. FreeSurfer. *Neuroimage* **62**, 774–81 (2012).
- 513 24. Falk, T. *et al.* U-net: Deep learning for cell counting, detection, and morphometry. *Nat*  
514 *Methods* **16**, 67–70 (2019).
- 515 25. Bashyam, V. M. *et al.* MRI signatures of brain age and disease over the lifespan based  
516 on a deep brain network and 14,468 individuals worldwide. *Brain* **143**, 2312–2324 (2020).
- 517 26. Goubran, M. *et al.* Hippocampal segmentation for brains with extensive atrophy using  
518 three-dimensional convolutional neural networks. *Hum Brain Mapp* **41**, 291–308 (2020).
- 519 27. Li, H. *et al.* Fully convolutional network ensembles for white matter hyperintensities  
520 segmentation in mr images. *Neuroimage* **183**, 650–665 (2018).
- 521 28. Haris, M., Shakhnarovich, G. & Ukita, N. Deep back-projection networks for super-  
522 resolution. in *2018 IEEE/CVF Conference on Computer Vision and Pattern Recognition*  
523 1664–1673 (2018). doi:[10.1109/CVPR.2018.00179](https://doi.org/10.1109/CVPR.2018.00179).
- 524 29. Tustison, N. J. *et al.* Longitudinal mapping of cortical thickness measurements: An  
525 Alzheimer’s Disease Neuroimaging Initiative-based evaluation study. *J Alzheimers Dis* (2019)  
526 doi:[10.3233/JAD-190283](https://doi.org/10.3233/JAD-190283).
- 527 30. Avants, B. B., Klein, A., Tustison, N. J., Woo, J. & Gee, J. C. Evaluation of open-access,  
528 automated brain extraction methods on multi-site multi-disorder data. in *16th annual meeting*  
529 *for the organization of human brain mapping* (2010).
- 530 31. Rebsamen, M., Rummel, C., Reyes, M., Wiest, R. & McKinley, R. Direct cortical  
531 thickness estimation using deep learning-based anatomy segmentation and cortex parcellation.  
532 *Hum Brain Mapp* (2020) doi:[10.1002/hbm.25159](https://doi.org/10.1002/hbm.25159).
- 533 32. Henschel, L. *et al.* FastSurfer - a fast and accurate deep learning based neuroimaging  
534 pipeline. *Neuroimage* **219**, 117012 (2020).

- 535 33. Tustison, N. J. *et al.* N4ITK: Improved N3 bias correction. *IEEE Trans Med Imaging*  
536 **29**, 1310–20 (2010).
- 537 34. Ashburner, J. & Friston, K. J. Voxel-based morphometry—the methods. *Neuroimage* **11**,  
538 805–21 (2000).
- 539 35. Avants, B. *et al.* Eigenanatomy improves detection power for longitudinal cortical change.  
540 *Med Image Comput Comput Assist Interv* **15**, 206–13 (2012).
- 541 36. Klein, A. & Tourville, J. 101 labeled brain images and a consistent human cortical  
542 labeling protocol. *Front Neurosci* **6**, 171 (2012).
- 543 37. <https://brain-development.org/ixi-dataset/>.
- 544 38. Landman, B. A. *et al.* Multi-parametric neuroimaging reproducibility: A 3-T resource  
545 study. *Neuroimage* **54**, 2854–66 (2011).
- 546 39. [http://fcon\\_1000.projects.nitrc.org/indi/pro/nki.html](http://fcon_1000.projects.nitrc.org/indi/pro/nki.html).
- 547 40. <https://www.oasis-brains.org>.
- 548 41. Tustison, N. J. *et al.* Convolutional neural networks with template-based data augmenta-  
549 tion for functional lung image quantification. *Acad Radiol* **26**, 412–423 (2019).
- 550 42. Schlemper, J. *et al.* Attention gated networks: Learning to leverage salient regions in  
551 medical images. *Med Image Anal* **53**, 197–207 (2019).
- 552 43. Lemaitre, H. *et al.* Normal age-related brain morphometric changes: Nonuniformity  
553 across cortical thickness, surface area and gray matter volume? *Neurobiol Aging* **33**, 617.e1–9  
554 (2012).
- 555 44. Breiman, L. Random forests. *Machine Learning* **45**, 5–32 (2001).
- 556 45. Holbrook, A. J. *et al.* Anterolateral entorhinal cortex thickness as a new biomarker for  
557 early detection of Alzheimer’s disease. *Alzheimer’s & Dementia: Diagnosis, Assessment &*  
558 *Disease Monitoring* **12**, e12068 (2020).

- 559 46. Kriegeskorte, N., Simmons, W. K., Bellgowan, P. S. F. & Baker, C. I. Circular analysis  
560 in systems neuroscience: The dangers of double dipping. *Nat Neurosci* **12**, 535–40 (2009).
- 561 47. <https://bicr-resource.atr.jp/srpbs1600/>.
- 562 48. Verbeke, G. Linear mixed models for longitudinal data. in *Linear mixed models in practice*  
563 63–153 (Springer, 1997).
- 564 49. Gelman, A. & others. Prior distributions for variance parameters in hierarchical models  
565 (comment on article by Browne and Draper). *Bayesian analysis* **1**, 515–534 (2006).
- 566 50. McKinley, R. *et al.* Few-shot brain segmentation from weakly labeled data with deep  
567 heteroscedastic multi-task networks. *CoRR* **abs/1904.02436**, (2019).
- 568 51. Fonov, V. S., Evans, A. C., McKinstry, R. C., Almlí, C. & Collins, D. L. Unbiased  
569 nonlinear average age-appropriate brain templates from birth to adulthood. *NeuroImage*  
570 **S102**, (2009).
- 571 52. Nyúl, L. G. & Udupa, J. K. On standardizing the MR image intensity scale. *Magn Reson*  
572 *Med* **42**, 1072–81 (1999).
- 573 53. Clarkson, M. J. *et al.* A comparison of voxel and surface based cortical thickness  
574 estimation methods. *Neuroimage* **57**, 856–65 (2011).
- 575 54. Schwarz, C. G. *et al.* A large-scale comparison of cortical thickness and volume methods  
576 for measuring alzheimer’s disease severity. *Neuroimage Clin* **11**, 802–812 (2016).
- 577 55. Tustison, N. J. *et al.* Instrumentation bias in the use and evaluation of scientific software:  
578 Recommendations for reproducible practices in the computational sciences. *Front Neurosci*  
579 **7**, 162 (2013).

580 **Author contributions**

581 Conception and design N.T., A.H., M.Y., J.S., B.A. Analysis and interpretation N.T., A.H.,  
582 D.G., M.Y., J.S. B.A. Creation of new software N.T., P.C., H.J., J.M., G.D., J.D., S.D., N.C.,  
583 J.G., B.A. Drafting of manuscript N.T., A.H., P.C., H.J., J.M., G.D., J.G., B.A.

584 **Competing interests**

585 The authors declare no competing interests.
